# Supplementary material for: Construction of CNT-MgO-Ag-BaO Nanocomposite with Enhanced Field Emission and Hydrogen Sensing Performances
Source: MDPI journal article supplement (doi:10.3390/nano13050885), 2023-02-27
Supplement: s1 [file s1]

# Supplementary Material

## Construction of CNT-MgO-Ag-BaO Nanocomposite with Enhanced Field Emission and Hydrogen Sensing Performances

Xingzhen Liu, Weijin Qian \*, Yawei Chen, Mingliang Dong, Taxue Yu, Weijun Huang and Changkun Dong \*

Wenzhou Key Lab of Micro-Nano Optoelectronic Devices, Wenzhou University, Wenzhou 325035, China; lxz092799@163.com (X.L.); w2549117790@163.com (Y.C.); dml13946319580@163.com (M.D.); 13646557519@163.com (T.Y.); 18857757816@163.com (W.H.)

\* Correspondence: weijinqian@wzu.edu.cn (W.Q.), dck@wzu.edu.cn (C.D.); Tel.: +86-577-86689067 (C.D.)

### Index

SI-1. J-E curves of the CNT-based samples with three times FE tests.

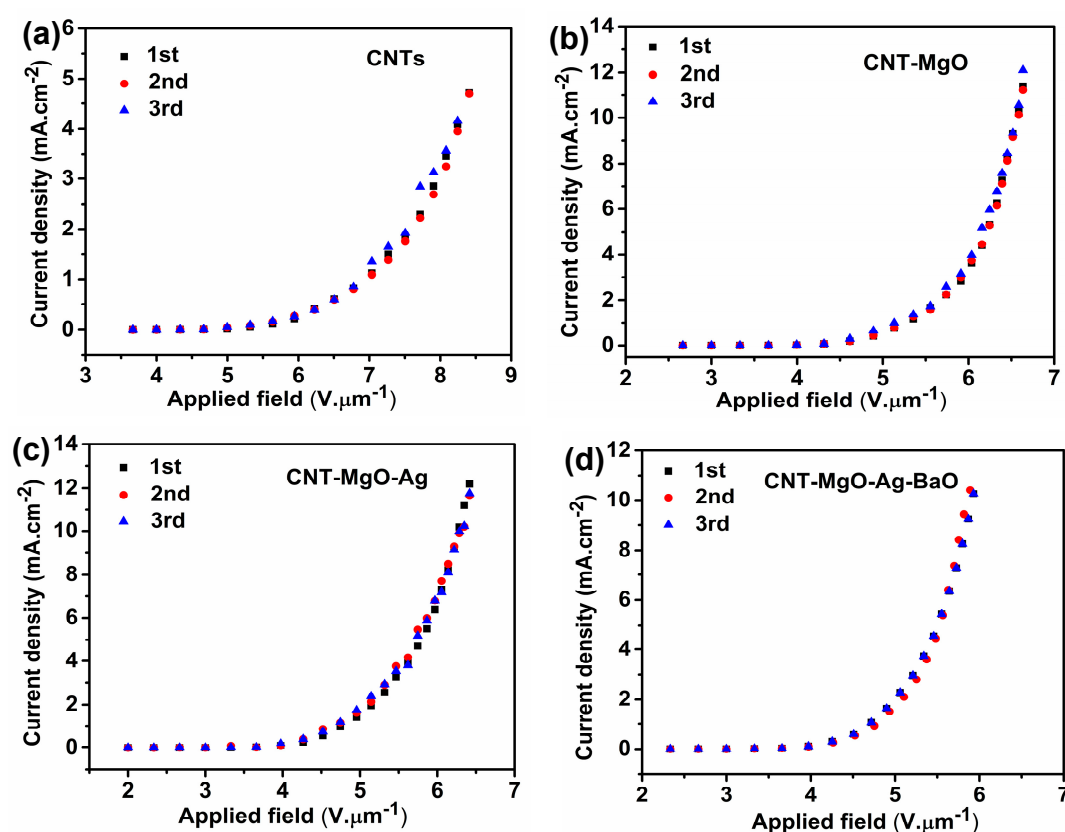

**Figure S1.** J-E curves of the CNT-based samples with three times FE tests. (a) the pristine CNTs; (b) CNT-MgO composite; (c) CNT-MgO-Ag composite; (d) CNT-MgO-Ag-BaO composite.
